# Supplementary material
Source: PubMed Central journal article supplement (PMC2781521)
Supplement: supp_M109.041665_jbc.M109.041665-1.pdf [file supp_M109.041665_jbc.M109.041665-1.pdf]

### Suppl. Figure 1



Suppl. fig. 1. A. Raw264.7 cells were assayed for chemotaxis in response to 3T3L1 mature adipocytes conditioned media (CM) or the corresponding non- conditioned serum free DMEM (DMEM). Raw264.7 having performed chemotaxis, at indicated times, were quantified. B. Raw264.7 cells were assayed for chemotaxis in response to CM or control serum free DMEM (DMEM). DMEM utilized either contained 5 or 25 mM glucose. Bars represent average values  $\pm$  S.D. of duplicates from at least three independent experiments. Letter A above the bars show statistical groups ( $p < 0.05$ ).
