# Supplementary material
Source: PubMed Central journal article supplement (PMC2781521)
Supplement: supp_M109.041665_jbc.M109.041665-2.pdf [file supp_M109.041665_jbc.M109.041665-2.pdf]

Suppl. Figure 2



Suppl. fig. 2. A. Chemotaxis assay towards either serum free DMEM (DMEM) or 24 hours mature adipocytes 3T3L1 conditioned media (CM-Un) was performed with Raw264.7 that were pretreated for 30' with vehicle (DMSO) or Akt inhibitor (10 $\mu$ M) and or PD 98,059 (10 $\mu$ M). B. C. Western- blots were performed on protein extracts from Raw264.7 cells that were pre- treated with vehicle, Akti and or PD 98,059 as described above, and subsequently exposed to serum free DMEM or 24 hours mature adipocytes 3T3L1 conditioned media (5' and 15' in B, 15 in C). Bars represent average values  $\pm$  S.D. of duplicates from at least three independent experiments. Letter A above the bars show statistical groups ( $p < 0.05$ ).
