# Supplementary material
Source: PubMed Central journal article supplement (PMC2781521)
Supplement: supp_M109.041665_jbc.M109.041665-3.pdf [file supp_M109.041665_jbc.M109.041665-3.pdf]

Suppl. Figure 3

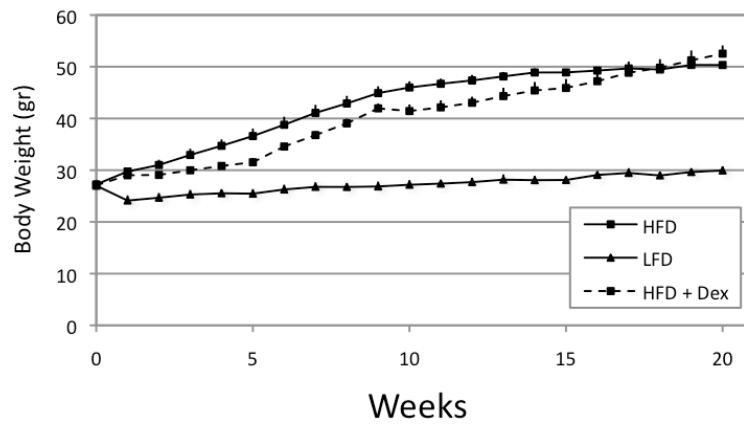

Suppl. fig. 3. Growth curves for mice from the 4 different groups: Normal Chow Diet (NCD), High Fat Diet (HFD) and HFD treated with Dexamethasone (HFD + Dex).
