# Supplementary material
Source: PubMed Central journal article supplement (PMC2781521)
Supplement: supp_M109.041665_jbc.M109.041665-4.pdf [file supp_M109.041665_jbc.M109.041665-4.pdf]

Suppl. Figure 4

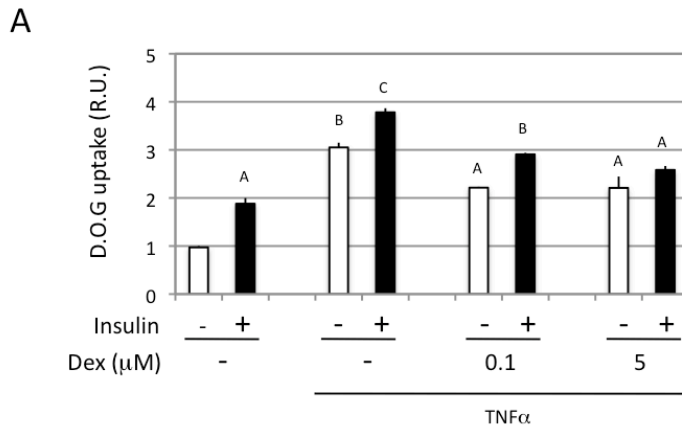

**B**

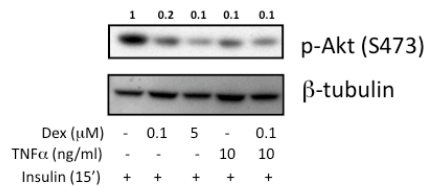

**Suppl. fig. 4.** A. 3T3-L1 adipocytes were pretreated 24 hours in DMEM containing 10% FBS with drugs at indicated concentrations for dexamethasone and 10ng/ml TNF $\alpha$ . 3T3L1 were then serum starved for 3 h, and stimulated with 0.17nM insulin. Glucose uptake was determined after the addition of DOG and normalization to the total proteins contents. B. Western- blots were performed on proteins extracts from 3T3L1 utilized for the DOG uptake assay. Bars represent average values  $\pm$  S.D. of duplicates from at least three independent experiments. Letters A and B above the bars show statistical groups ( $p < 0.05$ ).
